# Supplementary material
Source: MDPI journal article supplement (https://www.mdpi.com/2311-7524/7/6/135)
Supplement: s1 [file s1]

# Supplementary Materials: An Early Calcium Loading during Cherry Tree Dormancy Improves Fruit Quality Features at Harvest

Michail Michailidis, Chrysanthi Polychroniadou, Maria- Anastasia Kosmidou, Dafni Petra-ki-Katsoulaki, Evangelos Karagiannis, Athanasios Molassiotis and Georgia Tanou

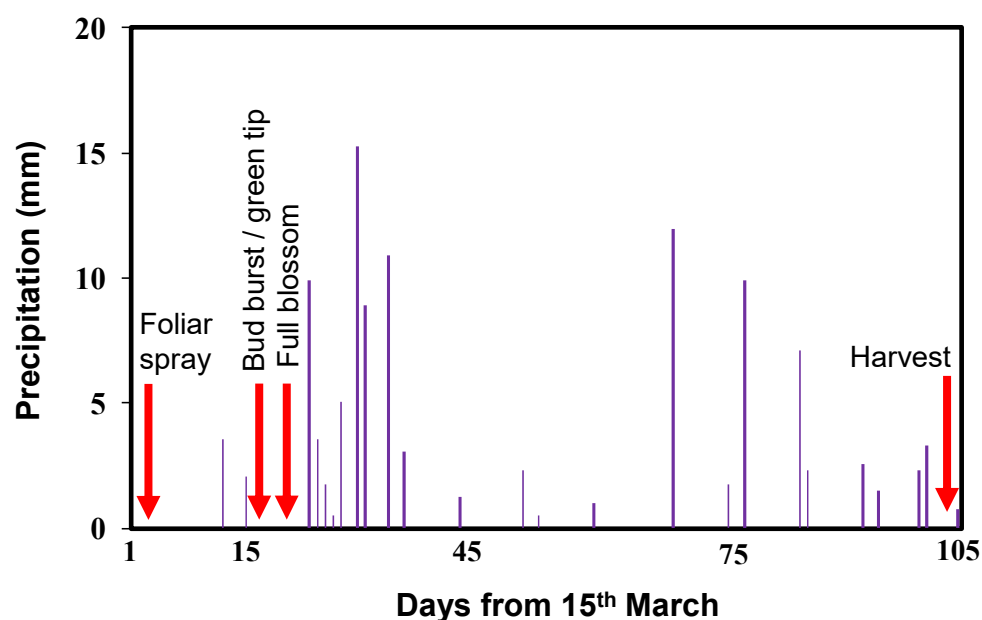

**Figure S1.** Precipitation graph from 15th March until harvest and timeline of foliar sprays, bud burst, and full blossom.

**Table S1.** Quantitative results of mineral elements in phloem, flower, and vegetative buds.

|                                                  | Phloem  |       |      |         |        |       |         |       |       |         |       |       |         |
|--------------------------------------------------|---------|-------|------|---------|--------|-------|---------|-------|-------|---------|-------|-------|---------|
|                                                  | % DW    | P     |      |         | K      |       |         | Mg    |       |         | Na    |       |         |
|                                                  |         | Mean  | SD   | P-value | Mean   | SD    | P-value | Mean  | SD    | P-value | Mean  | SD    | P-value |
| Molarity of CaCl <sub>2</sub> *2H <sub>2</sub> O | Control | 0.33  | 0.06 | NS      | 0.34   | 0.03  | NS      | 0.17  | 0.02  | NS      | 0.03  | 0.005 | NS      |
|                                                  | 0.25    | 0.35  | 0.06 |         | 0.4    | 0.04  |         | 0.23  | 0.02  |         | 0.039 | 0.007 |         |
|                                                  | 0.5     | 0.31  | 0.04 |         | 0.36   | 0.03  |         | 0.18  | 0.02  |         | 0.03  | 0.002 |         |
|                                                  | 1       | 0.34  | 0.05 |         | 0.34   | 0.04  |         | 0.21  | 0.03  |         | 0.034 | 0.003 |         |
|                                                  | ppm, DW | Zn    |      |         | Cu     |       |         | Mn    |       |         | Fe    |       |         |
|                                                  |         | Mean  | SD   | P-value | Mean   | SD    | P-value | Mean  | SD    | P-value | Mean  | SD    | P-value |
| Molarity of CaCl <sub>2</sub> *2H <sub>2</sub> O | Control | 22.96 | 3.9  | NS      | 100.12 | 15.93 | NS      | 99.45 | 9.95  | NS      | 64.25 | 12.06 | NS      |
|                                                  | 0.25    | 28.89 | 6.55 |         | 72.73  | 20.33 |         | 84.94 | 5.15  |         | 64.7  | 20.46 |         |
|                                                  | 0.5     | 21.73 | 5.04 |         | 94.97  | 20.71 |         | 86.93 | 13.35 |         | 50.89 | 8.22  |         |
|                                                  | 1       | 29.16 | 7.28 |         | 101.56 | 15.32 |         | 87.73 | 3.42  |         | 58.9  | 16.78 |         |
|                                                  |         |       |      |         |        |       |         |       |       |         |       |       |         |
| Flower buds                                      |         |       |      |         |        |       |         |       |       |         |       |       |         |
|                                                  | % DW    | P     |      |         | K      |       |         | Mg    |       |         | Na    |       |         |
|                                                  |         | Mean  | SD   | P-value | Mean   | SD    | P-value | Mean  | SD    | P-value | Mean  | SD    | P-value |
| Molarity of CaCl <sub>2</sub> *2H <sub>2</sub> O | Control | 0.81b | 0.06 | *       | 1.14   | 0.1   | NS      | 0.3   | 0.01  | NS      | 0.027 | 0.001 | NS      |
|                                                  | 0.25    | 0.86b | 0.05 |         | 1.09   | 0.03  |         | 0.29  | 0.01  |         | 0.029 | 0.002 |         |
|                                                  | 0.5     | 0.9ab | 0.06 |         | 1.09   | 0.06  |         | 0.33  | 0.02  |         | 0.033 | 0.002 |         |
|                                                  | 1       | 0.99a | 0.07 |         | 1.19   | 0.12  |         | 0.33  | 0.02  |         | 0.034 | 0.009 |         |
|                                                  | ppm, DW | Zn    |      |         | Cu     |       |         | Mn    |       |         | Fe    |       |         |
|                                                  |         | Mean  | SD   | P-value | Mean   | SD    | P-value | Mean  | SD    | P-value | Mean  | SD    | P-value |
| Molarity of CaCl <sub>2</sub> *2H <sub>2</sub> O | Control | 20.64 | 0.67 | NS      | 53.28  | 15.29 | NS      | 14.4  | 1.66  | NS      | 44.62 | 11.31 | NS      |
|                                                  | 0.25    | 18.78 | 2.51 |         | 32.37  | 5.92  |         | 12.99 | 0.58  |         | 40.62 | 8.19  |         |
|                                                  | 0.5     | 19.04 | 2.48 |         | 47.09  | 18.23 |         | 13.1  | 2.03  |         | 37.69 | 11.45 |         |
|                                                  | 1       | 20.55 | 3.38 |         | 48.23  | 3.13  |         | 13.59 | 0.93  |         | 37.11 | 7.3   |         |
|                                                  |         |       |      |         |        |       |         |       |       |         |       |       |         |
| Vegetative buds                                  |         |       |      |         |        |       |         |       |       |         |       |       |         |
|                                                  | % DW    | P     |      |         | K      |       |         | Mg    |       |         | Na    |       |         |
|                                                  |         | Mean  | SD   | P-value | Mean   | SD    | P-value | Mean  | SD    | P-value | Mean  | SD    | P-value |
| Molarity of CaCl <sub>2</sub> *2H <sub>2</sub> O | Control | 0.84  | 0.03 | NS      | 0.89   | 0.06  | NS      | 0.33  | 0.02  | NS      | 0.048 | 0.007 | NS      |
|                                                  | 0.25    | 0.79  | 0.05 |         | 0.88   | 0.06  |         | 0.3   | 0.01  |         | 0.049 | 0.017 |         |
|                                                  | 0.5     | 0.8   | 0.05 |         | 0.94   | 0.08  |         | 0.31  | 0.03  |         | 0.055 | 0.011 |         |
|                                                  | 1       | 0.83  | 0.05 |         | 0.89   | 0.12  |         | 0.34  | 0.03  |         | 0.037 | 0.009 |         |
|                                                  | ppm, DW | Zn    |      |         | Cu     |       |         | Mn    |       |         | Fe    |       |         |
|                                                  |         | Mean  | SD   | P-value | Mean   | SD    | P-value | Mean  | SD    | P-value | Mean  | SD    | P-value |
| Molarity of CaCl <sub>2</sub> *2H <sub>2</sub> O | Control | 18.95 | 4.22 | NS      | 53.79  | 17.67 | NS      | 15.6  | 0.6   | NS      | 48.57 | 5.44  | NS      |
|                                                  | 0.25    | 22.53 | 0.13 |         | 39.4   | 8.96  |         | 15.96 | 0.58  |         | 45.25 | 10.62 |         |
|                                                  | 0.5     | 21.48 | 1.64 |         | 56.42  | 19.67 |         | 16.35 | 1.55  |         | 46.31 | 2.32  |         |
|                                                  | 1       | 21.31 | 2.96 |         | 38.75  | 6.34  |         | 14.37 | 0.08  |         | 45.01 | 9.84  |         |

Different letters indicate significant difference based on Duncan's Multiple Range Test;  $P \leq 0.05$

NS: No Significance

Table S2. Quantitative results of sweet cherry quality traits.

| Ratio flesh fruit <sup>-1</sup> (%)                                                              |         |       |      | Penetration force (N)                                           |         |       |      | Polyphenols (µg gallic acid g <sup>-1</sup> FW)                 |         |        |       | Anthocyanins (µg cyanidin g <sup>-1</sup> FW)                   |         |       |      | Flavonols (µg rutin g <sup>-1</sup> FW)                         |         |       |       |
|--------------------------------------------------------------------------------------------------|---------|-------|------|-----------------------------------------------------------------|---------|-------|------|-----------------------------------------------------------------|---------|--------|-------|-----------------------------------------------------------------|---------|-------|------|-----------------------------------------------------------------|---------|-------|-------|
| Treatment (T)                                                                                    |         | Mean  | SD   | Treatment (T)                                                   |         | Mean  | SD   | Treatment (T)                                                   |         | Mean   | SD    | Treatment (T)                                                   |         | Mean  | SD   | Treatment (T)                                                   |         | Mean  | SD    |
| CaCl <sub>2</sub> *<br>0.25M<br>0.5M<br>2H <sub>2</sub> O<br>1M                                  | Control | 94.88 | 0.4  | CaCl <sub>2</sub> *<br>0.25M<br>0.5M<br>2H <sub>2</sub> O<br>1M | Control | 13.78 | 2.04 | CaCl <sub>2</sub> *<br>0.25M<br>0.5M<br>2H <sub>2</sub> O<br>1M | Control | 179.92 | 34.73 | CaCl <sub>2</sub> *<br>0.25M<br>0.5M<br>2H <sub>2</sub> O<br>1M | Control | 26.15 | 8.44 | CaCl <sub>2</sub> *<br>0.25M<br>0.5M<br>2H <sub>2</sub> O<br>1M | Control | 33.68 | 4.23  |
|                                                                                                  | 0.25M   | 94.86 | 0.19 |                                                                 | 0.25M   | 13.78 | 2.48 |                                                                 | 0.25M   | 179.01 | 26.05 |                                                                 | 0.25M   | 24.79 | 7.14 |                                                                 | 0.25M   | 34.97 | 8.99  |
|                                                                                                  | 0.5M    | 94.92 | 0.25 |                                                                 | 0.5M    | 13.97 | 2.21 |                                                                 | 0.5M    | 185.84 | 23.75 |                                                                 | 0.5M    | 23.02 | 4.64 |                                                                 | 0.5M    | 37.5  | 14.33 |
|                                                                                                  | 1M      | 94.92 | 0.26 |                                                                 | 1M      | 14.5  | 1.78 |                                                                 | 1M      | 192.69 | 29.89 |                                                                 | 1M      | 27.77 | 3.93 |                                                                 | 1M      | 33.52 | 9.44  |
| Age of Flower buds                                                                               |         |       |      | Age of Flower buds                                              |         |       |      | Age of Flower buds                                              |         |        |       | Age of Flower buds                                              |         |       |      | Age of Flower buds                                              |         |       |       |
| 1st                                                                                              |         |       |      | 1st                                                             |         |       |      | 1st                                                             |         |        |       | 1st                                                             |         |       |      | 1st                                                             |         |       |       |
| 2nd                                                                                              |         |       |      | 2nd                                                             |         |       |      | 2nd                                                             |         |        |       | 2nd                                                             |         |       |      | 2nd                                                             |         |       |       |
| Ripening (R) Color                                                                               |         |       |      | Ripening (R) Color                                              |         |       |      | Ripening (R) Color                                              |         |        |       | Ripening (R) Color                                              |         |       |      | Ripening (R) Color                                              |         |       |       |
| Red                                                                                              |         |       |      | Red                                                             |         |       |      | Red                                                             |         |        |       | Red                                                             |         |       |      | Red                                                             |         |       |       |
| Black                                                                                            |         |       |      | Black                                                           |         |       |      | Black                                                           |         |        |       | Black                                                           |         |       |      | Black                                                           |         |       |       |
| Factors                                                                                          |         |       |      | Factors                                                         |         |       |      | Factors                                                         |         |        |       | Factors                                                         |         |       |      | Factors                                                         |         |       |       |
| T                                                                                                |         |       |      | T                                                               |         |       |      | T                                                               |         |        |       | T                                                               |         |       |      | T                                                               |         |       |       |
| AS                                                                                               |         |       |      | AS                                                              |         |       |      | AS                                                              |         |        |       | AS                                                              |         |       |      | AS                                                              |         |       |       |
| R                                                                                                |         |       |      | R                                                               |         |       |      | R                                                               |         |        |       | R                                                               |         |       |      | R                                                               |         |       |       |
| T*AS                                                                                             |         |       |      | T*AS                                                            |         |       |      | T*AS                                                            |         |        |       | T*AS                                                            |         |       |      | T*AS                                                            |         |       |       |
| T*R                                                                                              |         |       |      | T*R                                                             |         |       |      | T*R                                                             |         |        |       | T*R                                                             |         |       |      | T*R                                                             |         |       |       |
| AS*R                                                                                             |         |       |      | AS*R                                                            |         |       |      | AS*R                                                            |         |        |       | AS*R                                                            |         |       |      | AS*R                                                            |         |       |       |
| T*AS*R                                                                                           |         |       |      | T*AS*R                                                          |         |       |      | T*AS*R                                                          |         |        |       | T*AS*R                                                          |         |       |      | T*AS*R                                                          |         |       |       |
| Different letters indicate significant difference based on Duncan's Multiple Range Test P ≤ 0.05 |         |       |      |                                                                 |         |       |      |                                                                 |         |        |       |                                                                 |         |       |      |                                                                 |         |       |       |

| Hydroxycinnamic acids (µg caffeic acid g <sup>-1</sup> FW)                                       |         |       |      | Skin cracking (% Christensen method)                            |         |       |       | Skin cracking (% Waterfall method)                              |         |       |       | Fruit water absorption (% Christensen method)                   |         |      |      | Fruit water absorption (% Waterfall method)                     |         |      |      |
|--------------------------------------------------------------------------------------------------|---------|-------|------|-----------------------------------------------------------------|---------|-------|-------|-----------------------------------------------------------------|---------|-------|-------|-----------------------------------------------------------------|---------|------|------|-----------------------------------------------------------------|---------|------|------|
| Treatment (T)                                                                                    |         | Mean  | SD   | Treatment (T)                                                   |         | Mean  | SD    | Treatment (T)                                                   |         | Mean  | SD    | Treatment (T)                                                   |         | Mean | SD   | Treatment (T)                                                   |         | Mean | SD   |
| CaCl <sub>2</sub> *<br>0.25M<br>0.5M<br>2H <sub>2</sub> O<br>1M                                  | Control | 41.28 | 6.21 | CaCl <sub>2</sub> *<br>0.25M<br>0.5M<br>2H <sub>2</sub> O<br>1M | Control | 76.94 | 7.84  | CaCl <sub>2</sub> *<br>0.25M<br>0.5M<br>2H <sub>2</sub> O<br>1M | Control | 35    | 16.78 | CaCl <sub>2</sub> *<br>0.25M<br>0.5M<br>2H <sub>2</sub> O<br>1M | Control | 3.17 | 0.35 | CaCl <sub>2</sub> *<br>0.25M<br>0.5M<br>2H <sub>2</sub> O<br>1M | Control | 1.53 | 0.34 |
|                                                                                                  | 0.25M   | 40.17 | 9.24 |                                                                 | 1M      | 70.83 | 12.84 |                                                                 | 1M      | 31.67 | 13.57 |                                                                 | 1M      | 3.25 | 0.27 |                                                                 | 1M      | 1.31 | 0.57 |
|                                                                                                  | 0.5M    | 43.01 | 9.36 |                                                                 |         |       |       |                                                                 |         |       |       |                                                                 |         |      |      |                                                                 |         |      |      |
|                                                                                                  | 1M      | 39.01 | 6.6  |                                                                 |         |       |       |                                                                 |         |       |       |                                                                 |         |      |      |                                                                 |         |      |      |
| Age of Flower buds                                                                               |         |       |      | Age of Flower buds                                              |         |       |       | Age of Flower buds                                              |         |       |       | Age of Flower buds                                              |         |      |      | Age of Flower buds                                              |         |      |      |
| 1st                                                                                              |         |       |      | 1st                                                             |         |       |       | 1st                                                             |         |       |       | 1st                                                             |         |      |      | 1st                                                             |         |      |      |
| 2nd                                                                                              |         |       |      | 2nd                                                             |         |       |       | 2nd                                                             |         |       |       | 2nd                                                             |         |      |      | 2nd                                                             |         |      |      |
| Ripening (R) Color                                                                               |         |       |      | Ripening (R) Color                                              |         |       |       | Ripening (R) Color                                              |         |       |       | Ripening (R) Color                                              |         |      |      | Ripening (R) Color                                              |         |      |      |
| Red                                                                                              |         |       |      | Red                                                             |         |       |       | Red                                                             |         |       |       | Red                                                             |         |      |      | Red                                                             |         |      |      |
| Black                                                                                            |         |       |      | Black                                                           |         |       |       | Black                                                           |         |       |       | Black                                                           |         |      |      | Black                                                           |         |      |      |
| Factors                                                                                          |         |       |      | Factors                                                         |         |       |       | Factors                                                         |         |       |       | Factors                                                         |         |      |      | Factors                                                         |         |      |      |
| T                                                                                                |         |       |      | T                                                               |         |       |       | T                                                               |         |       |       | T                                                               |         |      |      | T                                                               |         |      |      |
| AS                                                                                               |         |       |      | AS                                                              |         |       |       | AS                                                              |         |       |       | AS                                                              |         |      |      | AS                                                              |         |      |      |
| R                                                                                                |         |       |      | R                                                               |         |       |       | R                                                               |         |       |       | R                                                               |         |      |      | R                                                               |         |      |      |
| T*AS                                                                                             |         |       |      | T*AS                                                            |         |       |       | T*AS                                                            |         |       |       | T*AS                                                            |         |      |      | T*AS                                                            |         |      |      |
| T*R                                                                                              |         |       |      | T*R                                                             |         |       |       | T*R                                                             |         |       |       | T*R                                                             |         |      |      | T*R                                                             |         |      |      |
| AS*R                                                                                             |         |       |      | AS*R                                                            |         |       |       | AS*R                                                            |         |       |       | AS*R                                                            |         |      |      | AS*R                                                            |         |      |      |
| T*AS*R                                                                                           |         |       |      | T*AS*R                                                          |         |       |       | T*AS*R                                                          |         |       |       | T*AS*R                                                          |         |      |      | T*AS*R                                                          |         |      |      |
| Different letters indicate significant difference based on Duncan's Multiple Range Test P ≤ 0.05 |         |       |      |                                                                 |         |       |       |                                                                 |         |       |       |                                                                 |         |      |      |                                                                 |         |      |      |

| Ratio flesh fruit <sup>-1</sup> (%)                                                              |         |       |      | Penetration force (N)                                           |         |       |      | Polyphenols (µg gallic acid g <sup>-1</sup> FW)                 |         |        |       | Anthocyanins (µg cyanidin g <sup>-1</sup> FW)                   |         |       |      | Flavonols (µg rutin g <sup>-1</sup> FW)                         |         |       |       |
|--------------------------------------------------------------------------------------------------|---------|-------|------|-----------------------------------------------------------------|---------|-------|------|-----------------------------------------------------------------|---------|--------|-------|-----------------------------------------------------------------|---------|-------|------|-----------------------------------------------------------------|---------|-------|-------|
| Treatment (T)                                                                                    |         | Mean  | SD   | Treatment (T)                                                   |         | Mean  | SD   | Treatment (T)                                                   |         | Mean   | SD    | Treatment (T)                                                   |         | Mean  | SD   | Treatment (T)                                                   |         | Mean  | SD    |
| CaCl <sub>2</sub> *<br>0.25M<br>0.5M<br>2H <sub>2</sub> O<br>1M                                  | Control | 94.88 | 0.4  | CaCl <sub>2</sub> *<br>0.25M<br>0.5M<br>2H <sub>2</sub> O<br>1M | Control | 13.78 | 2.04 | CaCl <sub>2</sub> *<br>0.25M<br>0.5M<br>2H <sub>2</sub> O<br>1M | Control | 179.92 | 34.73 | CaCl <sub>2</sub> *<br>0.25M<br>0.5M<br>2H <sub>2</sub> O<br>1M | Control | 26.15 | 8.44 | CaCl <sub>2</sub> *<br>0.25M<br>0.5M<br>2H <sub>2</sub> O<br>1M | Control | 33.68 | 4.23  |
|                                                                                                  | 0.25M   | 94.86 | 0.19 |                                                                 | 0.25M   | 13.78 | 2.48 |                                                                 | 0.25M   | 179.01 | 26.05 |                                                                 | 0.25M   | 24.79 | 7.14 |                                                                 | 0.25M   | 34.97 | 8.99  |
|                                                                                                  | 0.5M    | 94.92 | 0.25 |                                                                 | 0.5M    | 13.97 | 2.21 |                                                                 | 0.5M    | 185.84 | 23.75 |                                                                 | 0.5M    | 23.02 | 4.64 |                                                                 | 0.5M    | 37.5  | 14.33 |
|                                                                                                  | 1M      | 94.92 | 0.26 |                                                                 | 1M      | 14.5  | 1.78 |                                                                 | 1M      | 192.69 | 29.89 |                                                                 | 1M      | 27.77 | 3.93 |                                                                 | 1M      | 33.52 | 9.44  |
| Age of Flower buds                                                                               |         |       |      | Age of Flower buds                                              |         |       |      | Age of Flower buds                                              |         |        |       | Age of Flower buds                                              |         |       |      | Age of Flower buds                                              |         |       |       |
| 1st                                                                                              |         |       |      | 1st                                                             |         |       |      | 1st                                                             |         |        |       | 1st                                                             |         |       |      | 1st                                                             |         |       |       |
| 2nd                                                                                              |         |       |      | 2nd                                                             |         |       |      | 2nd                                                             |         |        |       | 2nd                                                             |         |       |      | 2nd                                                             |         |       |       |
| Ripening (R) Color                                                                               |         |       |      | Ripening (R) Color                                              |         |       |      | Ripening (R) Color                                              |         |        |       | Ripening (R) Color                                              |         |       |      | Ripening (R) Color                                              |         |       |       |
| Red                                                                                              |         |       |      | Red                                                             |         |       |      | Red                                                             |         |        |       | Red                                                             |         |       |      | Red                                                             |         |       |       |
| Black                                                                                            |         |       |      | Black                                                           |         |       |      | Black                                                           |         |        |       | Black                                                           |         |       |      | Black                                                           |         |       |       |
| Factors                                                                                          |         |       |      | Factors                                                         |         |       |      | Factors                                                         |         |        |       | Factors                                                         |         |       |      | Factors                                                         |         |       |       |
| T                                                                                                |         |       |      | T                                                               |         |       |      | T                                                               |         |        |       | T                                                               |         |       |      | T                                                               |         |       |       |
| AS                                                                                               |         |       |      | AS                                                              |         |       |      | AS                                                              |         |        |       | AS                                                              |         |       |      | AS                                                              |         |       |       |
| R                                                                                                |         |       |      | R                                                               |         |       |      | R                                                               |         |        |       | R                                                               |         |       |      | R                                                               |         |       |       |
| T*AS                                                                                             |         |       |      | T*AS                                                            |         |       |      | T*AS                                                            |         |        |       | T*AS                                                            |         |       |      | T*AS                                                            |         |       |       |
| T*R                                                                                              |         |       |      | T*R                                                             |         |       |      | T*R                                                             |         |        |       | T*R                                                             |         |       |      | T*R                                                             |         |       |       |
| AS*R                                                                                             |         |       |      | AS*R                                                            |         |       |      | AS*R                                                            |         |        |       | AS*R                                                            |         |       |      | AS*R                                                            |         |       |       |
| T*AS*R                                                                                           |         |       |      | T*AS*R                                                          |         |       |      | T*AS*R                                                          |         |        |       | T*AS*R                                                          |         |       |      | T*AS*R                                                          |         |       |       |
| Different letters indicate significant difference based on Duncan's Multiple Range Test P ≤ 0.05 |         |       |      |                                                                 |         |       |      |                                                                 |         |        |       |                                                                 |         |       |      |                                                                 |         |       |       |

| Hydroxycinnamic acids (µg caffeic acid g <sup>-1</sup> FW)                                       |         |       |      | Skin cracking (% Christensen method)                            |         |       |       | Skin cracking (% Waterfall method)                              |         |       |       | Fruit water absorption (% Christensen method)                   |         |      |      | Fruit water absorption (% Waterfall method)                     |         |      |      |
|--------------------------------------------------------------------------------------------------|---------|-------|------|-----------------------------------------------------------------|---------|-------|-------|-----------------------------------------------------------------|---------|-------|-------|-----------------------------------------------------------------|---------|------|------|-----------------------------------------------------------------|---------|------|------|
| Treatment (T)                                                                                    |         | Mean  | SD   | Treatment (T)                                                   |         | Mean  | SD    | Treatment (T)                                                   |         | Mean  | SD    | Treatment (T)                                                   |         | Mean | SD   | Treatment (T)                                                   |         | Mean | SD   |
| CaCl <sub>2</sub> *<br>0.25M<br>0.5M<br>2H <sub>2</sub> O<br>1M                                  | Control | 41.28 | 6.21 | CaCl <sub>2</sub> *<br>0.25M<br>0.5M<br>2H <sub>2</sub> O<br>1M | Control | 76.94 | 7.84  | CaCl <sub>2</sub> *<br>0.25M<br>0.5M<br>2H <sub>2</sub> O<br>1M | Control | 35    | 16.78 | CaCl <sub>2</sub> *<br>0.25M<br>0.5M<br>2H <sub>2</sub> O<br>1M | Control | 3.17 | 0.35 | CaCl <sub>2</sub> *<br>0.25M<br>0.5M<br>2H <sub>2</sub> O<br>1M | Control | 1.53 | 0.34 |
|                                                                                                  | 0.25M   | 40.17 | 9.24 |                                                                 | 1M      | 70.83 | 12.84 |                                                                 | 1M      | 31.67 | 13.57 |                                                                 | 1M      | 3.25 | 0.27 |                                                                 | 1M      | 1.31 | 0.57 |
|                                                                                                  | 0.5M    | 43.01 | 9.36 |                                                                 |         |       |       |                                                                 |         |       |       |                                                                 |         |      |      |                                                                 |         |      |      |
|                                                                                                  | 1M      | 39.01 | 6.6  |                                                                 |         |       |       |                                                                 |         |       |       |                                                                 |         |      |      |                                                                 |         |      |      |
| Age of Flower buds                                                                               |         |       |      | Age of Flower buds                                              |         |       |       | Age of Flower buds                                              |         |       |       | Age of Flower buds                                              |         |      |      | Age of Flower buds                                              |         |      |      |
| 1st                                                                                              |         |       |      | 1st                                                             |         |       |       | 1st                                                             |         |       |       | 1st                                                             |         |      |      | 1st                                                             |         |      |      |
| 2nd                                                                                              |         |       |      | 2nd                                                             |         |       |       | 2nd                                                             |         |       |       | 2nd                                                             |         |      |      | 2nd                                                             |         |      |      |
| Ripening (R) Color                                                                               |         |       |      | Ripening (R) Color                                              |         |       |       | Ripening (R) Color                                              |         |       |       | Ripening (R) Color                                              |         |      |      | Ripening (R) Color                                              |         |      |      |
| Red                                                                                              |         |       |      | Red                                                             |         |       |       | Red                                                             |         |       |       | Red                                                             |         |      |      | Red                                                             |         |      |      |
| Black                                                                                            |         |       |      | Black                                                           |         |       |       | Black                                                           |         |       |       | Black                                                           |         |      |      | Black                                                           |         |      |      |
| Factors                                                                                          |         |       |      | Factors                                                         |         |       |       | Factors                                                         |         |       |       | Factors                                                         |         |      |      | Factors                                                         |         |      |      |
| T                                                                                                |         |       |      | T                                                               |         |       |       | T                                                               |         |       |       | T                                                               |         |      |      | T                                                               |         |      |      |
| AS                                                                                               |         |       |      | AS                                                              |         |       |       | AS                                                              |         |       |       | AS                                                              |         |      |      | AS                                                              |         |      |      |
| R                                                                                                |         |       |      | R                                                               |         |       |       | R                                                               |         |       |       | R                                                               |         |      |      | R                                                               |         |      |      |
| T*AS                                                                                             |         |       |      | T*AS                                                            |         |       |       | T*AS                                                            |         |       |       | T*AS                                                            |         |      |      | T*AS                                                            |         |      |      |
| T*R                                                                                              |         |       |      | T*R                                                             |         |       |       | T*R                                                             |         |       |       | T*R                                                             |         |      |      | T*R                                                             |         |      |      |
| AS*R                                                                                             |         |       |      | AS*R                                                            |         |       |       | AS*R                                                            |         |       |       | AS*R                                                            |         |      |      | AS*R                                                            |         |      |      |
| T*AS*R                                                                                           |         |       |      | T*AS*R                                                          |         |       |       | T*AS*R                                                          |         |       |       | T*AS*R                                                          |         |      |      | T*AS*R                                                          |         |      |      |
| Different letters indicate significant difference based on Duncan's Multiple Range Test P ≤ 0.05 |         |       |      |                                                                 |         |       |       |                                                                 |         |       |       |                                                                 |         |      |      |                                                                 |         |      |      |

| Ratio flesh fruit <sup>-1</sup> (%)                                                              |         |       |      | Penetration force (N)                                           |         |       |      | Polyphenols (µg gallic acid g <sup>-1</sup> FW)                 |         |        |       | Anthocyanins (µg cyanidin g <sup>-1</sup> FW)                   |         |       |      | Flavonols (µg rutin g <sup>-1</sup> FW)                         |         |       |       |
|--------------------------------------------------------------------------------------------------|---------|-------|------|-----------------------------------------------------------------|---------|-------|------|-----------------------------------------------------------------|---------|--------|-------|-----------------------------------------------------------------|---------|-------|------|-----------------------------------------------------------------|---------|-------|-------|
| Treatment (T)                                                                                    |         | Mean  | SD   | Treatment (T)                                                   |         | Mean  | SD   | Treatment (T)                                                   |         | Mean   | SD    | Treatment (T)                                                   |         | Mean  | SD   | Treatment (T)                                                   |         | Mean  | SD    |
| CaCl <sub>2</sub> *<br>0.25M<br>0.5M<br>2H <sub>2</sub> O<br>1M                                  | Control | 94.88 | 0.4  | CaCl <sub>2</sub> *<br>0.25M<br>0.5M<br>2H <sub>2</sub> O<br>1M | Control | 13.78 | 2.04 | CaCl <sub>2</sub> *<br>0.25M<br>0.5M<br>2H <sub>2</sub> O<br>1M | Control | 179.92 | 34.73 | CaCl <sub>2</sub> *<br>0.25M<br>0.5M<br>2H <sub>2</sub> O<br>1M | Control | 26.15 | 8.44 | CaCl <sub>2</sub> *<br>0.25M<br>0.5M<br>2H <sub>2</sub> O<br>1M | Control | 33.68 | 4.23  |
|                                                                                                  | 0.25M   | 94.86 | 0.19 |                                                                 | 0.25M   | 13.78 | 2.48 |                                                                 | 0.25M   | 179.01 | 26.05 |                                                                 | 0.25M   | 24.79 | 7.14 |                                                                 | 0.25M   | 34.97 | 8.99  |
|                                                                                                  | 0.5M    | 94.92 | 0.25 |                                                                 | 0.5M    | 13.97 | 2.21 |                                                                 | 0.5M    | 185.84 | 23.75 |                                                                 | 0.5M    | 23.02 | 4.64 |                                                                 | 0.5M    | 37.5  | 14.33 |
|                                                                                                  | 1M      | 94.92 | 0.26 |                                                                 | 1M      | 14.5  | 1.78 |                                                                 | 1M      | 192.69 | 29.89 |                                                                 | 1M      | 27.77 | 3.93 |                                                                 | 1M      | 33.52 | 9.44  |
| Age of Flower buds                                                                               |         |       |      | Age of Flower buds                                              |         |       |      | Age of Flower buds                                              |         |        |       | Age of Flower buds                                              |         |       |      | Age of Flower buds                                              |         |       |       |
| 1st                                                                                              |         |       |      | 1st                                                             |         |       |      | 1st                                                             |         |        |       | 1st                                                             |         |       |      | 1st                                                             |         |       |       |
| 2nd                                                                                              |         |       |      | 2nd                                                             |         |       |      | 2nd                                                             |         |        |       | 2nd                                                             |         |       |      | 2nd                                                             |         |       |       |
| Ripening (R) Color                                                                               |         |       |      | Ripening (R) Color                                              |         |       |      | Ripening (R) Color                                              |         |        |       | Ripening (R) Color                                              |         |       |      | Ripening (R) Color                                              |         |       |       |
| Red                                                                                              |         |       |      | Red                                                             |         |       |      | Red                                                             |         |        |       | Red                                                             |         |       |      | Red                                                             |         |       |       |
| Black                                                                                            |         |       |      | Black                                                           |         |       |      | Black                                                           |         |        |       | Black                                                           |         |       |      | Black                                                           |         |       |       |
| Factors                                                                                          |         |       |      | Factors                                                         |         |       |      | Factors                                                         |         |        |       | Factors                                                         |         |       |      | Factors                                                         |         |       |       |
| T                                                                                                |         |       |      | T                                                               |         |       |      | T                                                               |         |        |       | T                                                               |         |       |      | T                                                               |         |       |       |
| AS                                                                                               |         |       |      | AS                                                              |         |       |      | AS                                                              |         |        |       | AS                                                              |         |       |      | AS                                                              |         |       |       |
| R                                                                                                |         |       |      | R                                                               |         |       |      | R                                                               |         |        |       | R                                                               |         |       |      | R                                                               |         |       |       |
| T*AS                                                                                             |         |       |      | T*AS                                                            |         |       |      | T*AS                                                            |         |        |       | T*AS                                                            |         |       |      | T*AS                                                            |         |       |       |
| T*R                                                                                              |         |       |      | T*R                                                             |         |       |      | T*R                                                             |         |        |       | T*R                                                             |         |       |      | T*R                                                             |         |       |       |
| AS*R                                                                                             |         |       |      | AS*R                                                            |         |       |      | AS*R                                                            |         |        |       | AS*R                                                            |         |       |      | AS*R                                                            |         |       |       |
| T*AS*R                                                                                           |         |       |      | T*AS*R                                                          |         |       |      | T*AS*R                                                          |         |        |       | T*AS*R                                                          |         |       |      | T*AS*R                                                          |         |       |       |
| Different letters indicate significant difference based on Duncan's Multiple Range Test P ≤ 0.05 |         |       |      |                                                                 |         |       |      |                                                                 |         |        |       |                                                                 |         |       |      |                                                                 |         |       |       |

| Hydroxycinnamic acids (µg caffeic acid g <sup>-1</sup> FW)                                       |         |       |      | Skin cracking (% Christensen method)                            |         |       |       | Skin cracking (% Waterfall method)                              |         |       |       | Fruit water absorption (% Christensen method)                   |         |      |      | Fruit water absorption (% Waterfall method)                     |         |      |      |
|--------------------------------------------------------------------------------------------------|---------|-------|------|-----------------------------------------------------------------|---------|-------|-------|-----------------------------------------------------------------|---------|-------|-------|-----------------------------------------------------------------|---------|------|------|-----------------------------------------------------------------|---------|------|------|
| Treatment (T)                                                                                    |         | Mean  | SD   | Treatment (T)                                                   |         | Mean  | SD    | Treatment (T)                                                   |         | Mean  | SD    | Treatment (T)                                                   |         | Mean | SD   | Treatment (T)                                                   |         | Mean | SD   |
| CaCl <sub>2</sub> *<br>0.25M<br>0.5M<br>2H <sub>2</sub> O<br>1M                                  | Control | 41.28 | 6.21 | CaCl <sub>2</sub> *<br>0.25M<br>0.5M<br>2H <sub>2</sub> O<br>1M | Control | 76.94 | 7.84  | CaCl <sub>2</sub> *<br>0.25M<br>0.5M<br>2H <sub>2</sub> O<br>1M | Control | 35    | 16.78 | CaCl <sub>2</sub> *<br>0.25M<br>0.5M<br>2H <sub>2</sub> O<br>1M | Control | 3.17 | 0.35 | CaCl <sub>2</sub> *<br>0.25M<br>0.5M<br>2H <sub>2</sub> O<br>1M | Control | 1.53 | 0.34 |
|                                                                                                  | 0.25M   | 40.17 | 9.24 |                                                                 | 1M      | 70.83 | 12.84 |                                                                 | 1M      | 31.67 | 13.57 |                                                                 | 1M      | 3.25 | 0.27 |                                                                 | 1M      | 1.31 | 0.57 |
|                                                                                                  | 0.5M    | 43.01 | 9.36 |                                                                 |         |       |       |                                                                 |         |       |       |                                                                 |         |      |      |                                                                 |         |      |      |
|                                                                                                  | 1M      | 39.01 | 6.6  |                                                                 |         |       |       |                                                                 |         |       |       |                                                                 |         |      |      |                                                                 |         |      |      |
| Age of Flower buds                                                                               |         |       |      | Age of Flower buds                                              |         |       |       | Age of Flower buds                                              |         |       |       | Age of Flower buds                                              |         |      |      | Age of Flower buds                                              |         |      |      |
| 1st                                                                                              |         |       |      | 1st                                                             |         |       |       | 1st                                                             |         |       |       | 1st                                                             |         |      |      | 1st                                                             |         |      |      |
| 2nd                                                                                              |         |       |      | 2nd                                                             |         |       |       | 2nd                                                             |         |       |       | 2nd                                                             |         |      |      | 2nd                                                             |         |      |      |
| Ripening (R) Color                                                                               |         |       |      | Ripening (R) Color                                              |         |       |       | Ripening (R) Color                                              |         |       |       | Ripening (R) Color                                              |         |      |      | Ripening (R) Color                                              |         |      |      |
| Red                                                                                              |         |       |      | Red                                                             |         |       |       | Red                                                             |         |       |       | Red                                                             |         |      |      | Red                                                             |         |      |      |
| Black                                                                                            |         |       |      | Black                                                           |         |       |       | Black                                                           |         |       |       | Black                                                           |         |      |      | Black                                                           |         |      |      |
| Factors                                                                                          |         |       |      | Factors                                                         |         |       |       | Factors                                                         |         |       |       | Factors                                                         |         |      |      | Factors                                                         |         |      |      |
| T                                                                                                |         |       |      | T                                                               |         |       |       | T                                                               |         |       |       | T                                                               |         |      |      | T                                                               |         |      |      |
| AS                                                                                               |         |       |      | AS                                                              |         |       |       | AS                                                              |         |       |       | AS                                                              |         |      |      | AS                                                              |         |      |      |
| R                                                                                                |         |       |      | R                                                               |         |       |       | R                                                               |         |       |       | R                                                               |         |      |      | R                                                               |         |      |      |
| T*AS                                                                                             |         |       |      | T*AS                                                            |         |       |       | T*AS                                                            |         |       |       | T*AS                                                            |         |      |      | T*AS                                                            |         |      |      |
| T*R                                                                                              |         |       |      | T*R                                                             |         |       |       | T*R                                                             |         |       |       | T*R                                                             |         |      |      | T*R                                                             |         |      |      |
| AS*R                                                                                             |         |       |      | AS*R                                                            |         |       |       | AS*R                                                            |         |       |       | AS*R                                                            |         |      |      | AS*R                                                            |         |      |      |
| T*AS*R                                                                                           |         |       |      | T*AS*R                                                          |         |       |       | T*AS*R                                                          |         |       |       | T*AS*R                                                          |         |      |      | T*AS*R                                                          |         |      |      |
| Different letters indicate significant difference based on Duncan's Multiple Range Test P ≤ 0.05 |         |       |      |                                                                 |         |       |       |                                                                 |         |       |       |                                                                 |         |      |      |                                                                 |         |      |      |

| Ratio flesh fruit <sup>-1</sup> (%)                                                              |         |       |      | Penetration force (N)                                           |         |       |      | Polyphenols (µg gallic acid g <sup>-1</sup> FW)                 |         |        |       | Anthocyanins (µg cyanidin g <sup>-1</sup> FW)                   |         |       |      | Flavonols (µg rutin g <sup>-1</sup> FW)                         |         |       |       |
|--------------------------------------------------------------------------------------------------|---------|-------|------|-----------------------------------------------------------------|---------|-------|------|-----------------------------------------------------------------|---------|--------|-------|-----------------------------------------------------------------|---------|-------|------|-----------------------------------------------------------------|---------|-------|-------|
| Treatment (T)                                                                                    |         | Mean  | SD   | Treatment (T)                                                   |         | Mean  | SD   | Treatment (T)                                                   |         | Mean   | SD    | Treatment (T)                                                   |         | Mean  | SD   | Treatment (T)                                                   |         | Mean  | SD    |
| CaCl <sub>2</sub> *<br>0.25M<br>0.5M<br>2H <sub>2</sub> O<br>1M                                  | Control | 94.88 | 0.4  | CaCl <sub>2</sub> *<br>0.25M<br>0.5M<br>2H <sub>2</sub> O<br>1M | Control | 13.78 | 2.04 | CaCl <sub>2</sub> *<br>0.25M<br>0.5M<br>2H <sub>2</sub> O<br>1M | Control | 179.92 | 34.73 | CaCl <sub>2</sub> *<br>0.25M<br>0.5M<br>2H <sub>2</sub> O<br>1M | Control | 26.15 | 8.44 | CaCl <sub>2</sub> *<br>0.25M<br>0.5M<br>2H <sub>2</sub> O<br>1M | Control | 33.68 | 4.23  |
|                                                                                                  | 0.25M   | 94.86 | 0.19 |                                                                 | 0.25M   | 13.78 | 2.48 |                                                                 | 0.25M   | 179.01 | 26.05 |                                                                 | 0.25M   | 24.79 | 7.14 |                                                                 | 0.25M   | 34.97 | 8.99  |
|                                                                                                  | 0.5M    | 94.92 | 0.25 |                                                                 | 0.5M    | 13.97 | 2.21 |                                                                 | 0.5M    | 185.84 | 23.75 |                                                                 | 0.5M    | 23.02 | 4.64 |                                                                 | 0.5M    | 37.5  | 14.33 |
|                                                                                                  | 1M      | 94.92 | 0.26 |                                                                 | 1M      | 14.5  | 1.78 |                                                                 | 1M      | 192.69 | 29.89 |                                                                 | 1M      | 27.77 | 3.93 |                                                                 | 1M      | 33.52 | 9.44  |
| Age of Flower buds                                                                               |         |       |      | Age of Flower buds                                              |         |       |      | Age of Flower buds                                              |         |        |       | Age of Flower buds                                              |         |       |      | Age of Flower buds                                              |         |       |       |
| 1st                                                                                              |         |       |      | 1st                                                             |         |       |      | 1st                                                             |         |        |       | 1st                                                             |         |       |      | 1st                                                             |         |       |       |
| 2nd                                                                                              |         |       |      | 2nd                                                             |         |       |      | 2nd                                                             |         |        |       | 2nd                                                             |         |       |      | 2nd                                                             |         |       |       |
| Ripening (R) Color                                                                               |         |       |      | Ripening (R) Color                                              |         |       |      | Ripening (R) Color                                              |         |        |       | Ripening (R) Color                                              |         |       |      | Ripening (R) Color                                              |         |       |       |
| Red                                                                                              |         |       |      | Red                                                             |         |       |      | Red                                                             |         |        |       | Red                                                             |         |       |      | Red                                                             |         |       |       |
| Black                                                                                            |         |       |      | Black                                                           |         |       |      | Black                                                           |         |        |       | Black                                                           |         |       |      | Black                                                           |         |       |       |
| Factors                                                                                          |         |       |      | Factors                                                         |         |       |      | Factors                                                         |         |        |       | Factors                                                         |         |       |      | Factors                                                         |         |       |       |
| T                                                                                                |         |       |      | T                                                               |         |       |      | T                                                               |         |        |       | T                                                               |         |       |      | T                                                               |         |       |       |
| AS                                                                                               |         |       |      | AS                                                              |         |       |      | AS                                                              |         |        |       | AS                                                              |         |       |      | AS                                                              |         |       |       |
| R                                                                                                |         |       |      | R                                                               |         |       |      | R                                                               |         |        |       | R                                                               |         |       |      | R                                                               |         |       |       |
| T*AS                                                                                             |         |       |      | T*AS                                                            |         |       |      | T*AS                                                            |         |        |       | T*AS                                                            |         |       |      | T*AS                                                            |         |       |       |
| T*R                                                                                              |         |       |      | T*R                                                             |         |       |      | T*R                                                             |         |        |       | T*R                                                             |         |       |      | T*R                                                             |         |       |       |
| AS*R                                                                                             |         |       |      | AS*R                                                            |         |       |      | AS*R                                                            |         |        |       | AS*R                                                            |         |       |      | AS*R                                                            |         |       |       |
| T*AS*R                                                                                           |         |       |      | T*AS*R                                                          |         |       |      | T*AS*R                                                          |         |        |       | T*AS*R                                                          |         |       |      | T*AS*R                                                          |         |       |       |
| Different letters indicate significant difference based on Duncan's Multiple Range Test P ≤ 0.05 |         |       |      |                                                                 |         |       |      |                                                                 |         |        |       |                                                                 |         |       |      |                                                                 |         |       |       |

| Hydroxycinnamic acids (µg caffeic acid g <sup>-1</sup> FW |  |  |  |
|-----------------------------------------------------------|--|--|--|
|-----------------------------------------------------------|--|--|--|

Table S3. Quantitative results of metabolites in sweet cherry skin.

| Metabolite reporting checklist |                                                                          |                                                                            |                                                                                                                                                                                                                                                                                                                                            |                                                 |
|--------------------------------|--------------------------------------------------------------------------|----------------------------------------------------------------------------|--------------------------------------------------------------------------------------------------------------------------------------------------------------------------------------------------------------------------------------------------------------------------------------------------------------------------------------------|-------------------------------------------------|
| Level                          | Aspect                                                                   | Information                                                                | Fill in                                                                                                                                                                                                                                                                                                                                    |                                                 |
| general aspect                 | Type of metabolome analysis                                              | targeted metabolite analysis                                               | FALSE                                                                                                                                                                                                                                                                                                                                      |                                                 |
|                                |                                                                          | non-targeted metabolite class scale profiling                              | TRUE                                                                                                                                                                                                                                                                                                                                       |                                                 |
|                                |                                                                          | non-targeted metabolome scale profiling                                    | FALSE                                                                                                                                                                                                                                                                                                                                      |                                                 |
|                                | Type of quantification                                                   | non-targeted finger printing of mass features                              | FALSE                                                                                                                                                                                                                                                                                                                                      |                                                 |
|                                |                                                                          | absolute or quantification                                                 | Quantification                                                                                                                                                                                                                                                                                                                             |                                                 |
|                                | Type of reference samples                                                | chemically defined                                                         | -                                                                                                                                                                                                                                                                                                                                          |                                                 |
|                                |                                                                          | biologically defined                                                       | Frozen grinding skin tissue of <i>Prunus avium</i> (0.5gr.)                                                                                                                                                                                                                                                                                |                                                 |
|                                | Type of replication                                                      | analytical (same analytical sample preparation)                            | 0                                                                                                                                                                                                                                                                                                                                          |                                                 |
|                                |                                                                          | technological (same biological preparation)                                | 0                                                                                                                                                                                                                                                                                                                                          |                                                 |
|                                |                                                                          | biological (same experimental condition)                                   | 3                                                                                                                                                                                                                                                                                                                                          |                                                 |
|                                | Type of technology                                                       | full experiment                                                            | 12                                                                                                                                                                                                                                                                                                                                         |                                                 |
|                                |                                                                          | reference publication                                                      | Libec, J., Schauer, N., Kopka, J., Willmitzer, L., and Fernie, A.R. (2006). Gas chromatography mass spectrometry-based metabolite profiling in plants. Nat. Protoc. 1: 387–396.                                                                                                                                                            |                                                 |
|                                | Sample preparation                                                       | method of sample preparation                                               | Derivatization with methoxyamine hydrochloride and then with N-methyl-N- (trimethylsilyl) tri-fluoroacetamide reagent (MSTFA)                                                                                                                                                                                                              |                                                 |
|                                |                                                                          | method of chromatography/separation                                        | Samples (1 µL) was injected and split ratio was 70:1. A TR-5MS capillary column 30m*0.25 mm x 0.25 µm was used. Injector temperature was 220 °C. Carrier gas flow rate was 1mL min <sup>-1</sup> . Temperature program was held at 70 °C for 2 min, then increased to 280 °C (rate 8 °C min <sup>-1</sup> ), where it remained for 18 min. |                                                 |
|                                | metabolite/mass feature                                                  | Metabolite                                                                 | method of ionization                                                                                                                                                                                                                                                                                                                       | Ion source 230 °C and the interface 250 °C      |
|                                |                                                                          |                                                                            | method of detection                                                                                                                                                                                                                                                                                                                        | Detection type (SQ MS), m/z 50–600 was recorded |
| metabolite name                |                                                                          | metabolite sum formula                                                     | NIST, GOLM, Pubchem                                                                                                                                                                                                                                                                                                                        |                                                 |
|                                |                                                                          | metabolite structure and public source of metabolite identifier            | C <sub>11</sub> H <sub>16</sub> O <sub>4</sub> , n=number                                                                                                                                                                                                                                                                                  |                                                 |
| Identification                 |                                                                          | metabolite structure and public source of metabolite identifier            | NIST, GOLM, Pubchem, KEGG                                                                                                                                                                                                                                                                                                                  |                                                 |
|                                |                                                                          | identification process                                                     | Manually                                                                                                                                                                                                                                                                                                                                   |                                                 |
|                                |                                                                          | by authentic mass isotopomer added to one or all biological sample(s)      | TRUE                                                                                                                                                                                                                                                                                                                                       |                                                 |
|                                |                                                                          | by authentic reference compound within a co-processed reference mixture    | FALSE                                                                                                                                                                                                                                                                                                                                      |                                                 |
|                                |                                                                          | by authentic reference compound previously mapped to the analytical system | TRUE                                                                                                                                                                                                                                                                                                                                       |                                                 |
|                                |                                                                          | reference library                                                          | NIST GOLM                                                                                                                                                                                                                                                                                                                                  |                                                 |
|                                |                                                                          | type of mass spectrum                                                      | m/z 50-600                                                                                                                                                                                                                                                                                                                                 |                                                 |
|                                |                                                                          | by match of molecular mass (single mass fragment)                          | -                                                                                                                                                                                                                                                                                                                                          |                                                 |
|                                |                                                                          | by match of fragments                                                      | -                                                                                                                                                                                                                                                                                                                                          |                                                 |
|                                |                                                                          | by match of fragmentation pattern                                          | -                                                                                                                                                                                                                                                                                                                                          |                                                 |
|                                |                                                                          | by match of mass spectrum to reference library                             | Yes                                                                                                                                                                                                                                                                                                                                        |                                                 |
|                                |                                                                          | type of retention index                                                    | time elution                                                                                                                                                                                                                                                                                                                               |                                                 |
| Quantification                 | by match of retention time (index) to reference library                  | 3%                                                                         |                                                                                                                                                                                                                                                                                                                                            |                                                 |
|                                | type of quantification                                                   | Relative abundance                                                         |                                                                                                                                                                                                                                                                                                                                            |                                                 |
| Validity testing               | Recovery testing (chemical analog)                                       | -                                                                          |                                                                                                                                                                                                                                                                                                                                            |                                                 |
|                                | Recovery testing (internally added mass isotopomer)                      | Adonitol                                                                   |                                                                                                                                                                                                                                                                                                                                            |                                                 |
|                                | Recovery testing (mixture of most divergent samples from the experiment) | -                                                                          |                                                                                                                                                                                                                                                                                                                                            |                                                 |
|                                | Test for linear range                                                    | -                                                                          |                                                                                                                                                                                                                                                                                                                                            |                                                 |
|                                | Limit of quantification (LOQ)                                            | 0.001                                                                      |                                                                                                                                                                                                                                                                                                                                            |                                                 |
|                                | Limit of detection (LOD)                                                 | 0.0005                                                                     |                                                                                                                                                                                                                                                                                                                                            |                                                 |

| <p><b>Experiment title:</b><br/> <b>Organism/Plant species:</b> <i>Prunus avium L.</i><br/> <b>Organ/tissue:</b> fruit skin<br/> <b>Analytical tool:</b> GC-MS</p> <p>Peak no.- number referenced back to the main text<br/> Ret. Time- Retention time, in minutes (difference in Ret.Time between ES(+) and ES(-) modes was less than XX minutes)<br/> Putative Name- putative identification of the metabolite<br/> Mol. Formula- molecular formula of the metabolite or its FA adduct;<br/> MSMS fragments- fragments (10 largest)<br/> (S)- identification confirmed by a standard compound<br/> I, II, III- different isomers<br/> Identification level (A; B; C; D)- (A) standard or NMR; (B) MS/MS; (C) MS<sup>E</sup>; (D) MS only</p> |           |                                                                              |                                        |                  |                                                                              |                                                                                         |                                                            |                     |                            |
|------------------------------------------------------------------------------------------------------------------------------------------------------------------------------------------------------------------------------------------------------------------------------------------------------------------------------------------------------------------------------------------------------------------------------------------------------------------------------------------------------------------------------------------------------------------------------------------------------------------------------------------------------------------------------------------------------------------------------------------------|-----------|------------------------------------------------------------------------------|----------------------------------------|------------------|------------------------------------------------------------------------------|-----------------------------------------------------------------------------------------|------------------------------------------------------------|---------------------|----------------------------|
| Peak no.                                                                                                                                                                                                                                                                                                                                                                                                                                                                                                                                                                                                                                                                                                                                       | Ret. Time | Putative metabolite name                                                     | Corresponding metabolite in literature | Metabolite Class | Mol. formula                                                                 | MS/MS ES(+) fragments (10 largest)                                                      | Species detected before                                    | References          | Identification level (A-D) |
| 1                                                                                                                                                                                                                                                                                                                                                                                                                                                                                                                                                                                                                                                                                                                                              | 8.185     | Oxalic acid (2TMS)                                                           | Oxalic acid                            | Acid             | C <sub>8</sub> H <sub>10</sub> O <sub>6</sub> Si <sub>2</sub>                | 147/999, 73/118, 75/67, 52/3, 79/3, 66/2                                                | <i>Solanum lycopersicum L.</i>                             | nist, golm, pubchem | D                          |
| 2                                                                                                                                                                                                                                                                                                                                                                                                                                                                                                                                                                                                                                                                                                                                              | 11.39     | Silanol, trimethyl-, phosphate (3:1)                                         | Phosphoric acid                        | Other Compound   | C <sub>9</sub> H <sub>27</sub> O <sub>4</sub> P <sub>3</sub> Si <sub>3</sub> | 299/999, 73/287, 300/222, 301/127, 283/66, 133/62, 225/53, 314/53, 207/52, 147/50       | <i>Actinidia chinensis</i>                                 | nist, golm, pubchem | D                          |
| 3                                                                                                                                                                                                                                                                                                                                                                                                                                                                                                                                                                                                                                                                                                                                              | 11.86     | L-Proline, 2tms derivative                                                   | Proline                                | Amino Acid       | C <sub>11</sub> H <sub>25</sub> NO <sub>2</sub> Si <sub>2</sub>              | 142/999, 73/281, 75/135                                                                 | <i>Arabidopsis thaliana</i>                                | nist, golm, pubchem | A                          |
| 4                                                                                                                                                                                                                                                                                                                                                                                                                                                                                                                                                                                                                                                                                                                                              | 12.15     | Butanedioic acid, 2tms derivative                                            | Succinic acid                          | Acid             | C <sub>10</sub> H <sub>12</sub> O <sub>4</sub> Si <sub>2</sub>               | 147/999, 73/522, 75/184, 148/108, 149/26, 55/11, 74/7                                   | <i>Arabidopsis thaliana</i> , <i>Crataegus scabrifolia</i> | nist, golm, pubchem | D                          |
| 5                                                                                                                                                                                                                                                                                                                                                                                                                                                                                                                                                                                                                                                                                                                                              | 15.05     | Malic acid, 3tms derivative                                                  | Malic acid                             | Acid             | C <sub>13</sub> H <sub>20</sub> O <sub>5</sub> Si <sub>3</sub>               | 73/999, 147/785, 233/126, 133/126, 245/126, 148/125, 189/121, 75/113, 74/91, 190/84     | <i>Arabidopsis thaliana</i>                                | nist, golm, pubchem | A                          |
| 6                                                                                                                                                                                                                                                                                                                                                                                                                                                                                                                                                                                                                                                                                                                                              | 15.5      | 5-Oxoproline, 2tms derivative                                                | Oxoproline                             | Amino Acid       | C <sub>11</sub> H <sub>23</sub> NO <sub>2</sub> Si <sub>2</sub>              | 73/999, 156/231, 75/179, 147/11                                                         | <i>Arabidopsis thaliana</i>                                | nist, golm, pubchem | D                          |
| 7                                                                                                                                                                                                                                                                                                                                                                                                                                                                                                                                                                                                                                                                                                                                              | 15.67     | 4-aminobutanoic acid (3TMS)                                                  | GABA                                   | Amino Acid       | C <sub>13</sub> H <sub>23</sub> O <sub>2</sub> NSi <sub>3</sub>              | 174/999, 73/959, 147/382, 75/131                                                        | <i>Malus domestica</i>                                     | nist, golm, pubchem | D                          |
| 8                                                                                                                                                                                                                                                                                                                                                                                                                                                                                                                                                                                                                                                                                                                                              | 17.39     | D-(+)-ribose, tetrakis(trimethylsilyl) ether, trimethylsilyloxime (isomer 2) | Ribose                                 | Sugar            | C <sub>18</sub> H <sub>40</sub> NO <sub>5</sub> Si <sub>4</sub>              | 73/999, 103/773, 217/388, 147/341, 75/75, 189/62, 160/45, 74/42, 117/42, 133/31         | <i>Prunus persica L.</i>                                   | nist, golm, pubchem | D                          |
| 9                                                                                                                                                                                                                                                                                                                                                                                                                                                                                                                                                                                                                                                                                                                                              | 17.52     | D-arabinose, tetrakis(trimethylsilyl) ether, ethyloxime (isomer 2)           | Arabinose                              | Sugar            | C <sub>19</sub> H <sub>47</sub> O <sub>3</sub> NSi <sub>4</sub>              | 73/999, 103/715, 217/518, 147/362, 160/138, 189/119, 218/90, 117/83, 74/81, 133/75      | <i>Actinidia chinensis</i>                                 | nist, golm, pubchem | D                          |
| 10                                                                                                                                                                                                                                                                                                                                                                                                                                                                                                                                                                                                                                                                                                                                             | 17.61     | D-(+)-xylose, tetrakis(trimethylsilyl) ether, methyloxime (syn)              | Xylose                                 | Sugar            | C <sub>18</sub> H <sub>40</sub> NO <sub>5</sub> Si <sub>4</sub>              | 73/999, 204/760, 217/719, 109/542, 147/398, 205/256, 218/82, 129/80, 75/58, 117/43      | <i>Prunus avium</i>                                        | nist, golm, pubchem | D                          |
| 11                                                                                                                                                                                                                                                                                                                                                                                                                                                                                                                                                                                                                                                                                                                                             | 18.22     | L-(-)-arabitol, 5tms derivative                                              | Arabitol                               | Alcohol          | C <sub>20</sub> H <sub>32</sub> O <sub>2</sub> Si <sub>5</sub>               | 73/999, 147/661, 217/631, 103/613, 205/204, 117/64, 129/54, 75/24, 148/5, 189/3         | <i>Zizyphus jujube Mill.</i>                               | nist, golm, pubchem | D                          |
| 12                                                                                                                                                                                                                                                                                                                                                                                                                                                                                                                                                                                                                                                                                                                                             | 18.32     | L-Rhamnose, 4tms derivative                                                  | Rhamnose                               | Sugar            | C <sub>18</sub> H <sub>34</sub> O <sub>5</sub> Si <sub>4</sub>               | 73/999, 204/987, 147/412, 217/151, 191/75, 75/65, 205/36, 189/1                         | <i>Arabidopsis thaliana</i>                                | nist, golm, pubchem | D                          |
| 13                                                                                                                                                                                                                                                                                                                                                                                                                                                                                                                                                                                                                                                                                                                                             | 20.09     | D-(+)-Talofuranose, pentakis(trimethylsilyl) ether (isomer 2)                | Talose                                 | Sugar            | C <sub>21</sub> H <sub>32</sub> O <sub>6</sub> Si <sub>5</sub>               | 73/999, 204/987, 147/412, 217/151, 191/75, 75/65, 205/36, 189/1                         | <i>Amaranthus tricolor</i>                                 | nist, golm, pubchem | D                          |
| 14                                                                                                                                                                                                                                                                                                                                                                                                                                                                                                                                                                                                                                                                                                                                             | 20.168    | Gulonic acid, gamma-, lactone, 4tms derivative                               | Gulonic acid                           | Sugar            | C <sub>18</sub> H <sub>32</sub> O <sub>6</sub> Si <sub>4</sub>               | 73/999, 217/467, 147/427, 204/409, 205/173, 103/150, 129/116, 189/107, 75/96, 117/84    | <i>Arabidopsis thaliana</i>                                | nist, golm, pubchem | D                          |
| 14                                                                                                                                                                                                                                                                                                                                                                                                                                                                                                                                                                                                                                                                                                                                             | 20.27     | Quinic acid (5tms)                                                           | Quinic acid                            | Acid             | C <sub>22</sub> H <sub>32</sub> O <sub>6</sub> Si <sub>5</sub>               | 73/999, 147/435, 345/359, 255/252, 217/228, 103/214, 191/87, 75/86, 204/58, 205/51      | <i>Malus domestica</i>                                     | nist, golm, pubchem | D                          |
| 15                                                                                                                                                                                                                                                                                                                                                                                                                                                                                                                                                                                                                                                                                                                                             | 20.54     | D-Fructose, 1,3,4,5,6-pentakis-O-(trimethylsilyl)-, O-methyloxime            | Fructose                               | Sugar            | C <sub>22</sub> H <sub>38</sub> NO <sub>6</sub> Si <sub>5</sub>              | 73/999, 103/890, 217/597, 147/384, 307/158, 133/114, 218/110, 277/105, 189/95, 117/89   | <i>Prunus avium</i>                                        | nist, golm, pubchem | D                          |
| 16                                                                                                                                                                                                                                                                                                                                                                                                                                                                                                                                                                                                                                                                                                                                             | 20.88     | D-glucose, 2,3,4,5,6-pentakis-o-(trimethylsilyl)-, o-methyloxime, (1z)-      | Glucose                                | Sugar            | C <sub>22</sub> H <sub>38</sub> NO <sub>6</sub> Si <sub>5</sub>              | 73/999, 147/571, 205/491, 160/461, 319/229, 103/223, 217/219, 117/169, 129/109, 148/90  | <i>Arabidopsis thaliana</i>                                | nist, golm, pubchem | A                          |
| 17                                                                                                                                                                                                                                                                                                                                                                                                                                                                                                                                                                                                                                                                                                                                             | 21.07     | D-galactose, 2,3,4,5,6-pentakis-o-(trimethylsilyl)-, o-methyloxime, (1z)-    | Galactose                              | Sugar            | C <sub>22</sub> H <sub>38</sub> NO <sub>6</sub> Si <sub>5</sub>              | 73/999, 147/658, 205/535, 160/401, 103/324, 319/270, 217/238, 117/180, 133/119, 129/115 | <i>Arabidopsis thaliana</i>                                | nist, golm, pubchem | D                          |
| 18                                                                                                                                                                                                                                                                                                                                                                                                                                                                                                                                                                                                                                                                                                                                             | 21.36     | D-Sorbitol, 6tms derivative                                                  | Sorbitol                               | Alcohol          | C <sub>24</sub> H <sub>42</sub> O <sub>6</sub> Si <sub>6</sub>               | 73/999, 147/622, 205/575, 103/422, 217/413, 319/304, 117/180, 129/110, 189/102,         | <i>Arabidopsis thaliana</i>                                | nist, golm, pubchem | A                          |
| 20                                                                                                                                                                                                                                                                                                                                                                                                                                                                                                                                                                                                                                                                                                                                             | 22.01     | D-(+)-Galacturonic acid, 5tms derivative                                     | Galacturonic acid                      | Acid             | C <sub>21</sub> H <sub>30</sub> O <sub>7</sub> Si <sub>5</sub>               | 73/999, 147/461, 204/278, 217/275, 205/223, 103/169, 75/82, 117/38, 218/32, 191/29      | <i>Arabidopsis thaliana</i>                                | nist, golm, pubchem | A                          |
| 21                                                                                                                                                                                                                                                                                                                                                                                                                                                                                                                                                                                                                                                                                                                                             | 23.13     | Inositol, (z)-, 6tms derivative                                              | Inositol                               | Alcohol          | C <sub>24</sub> H <sub>40</sub> O <sub>6</sub> Si <sub>6</sub>               | 73/999, 217/680, 147/508, 305/482, 191/192, 204/170, 318/133, 75/66, 129/46, 103/38     | <i>Arabidopsis thaliana</i>                                | nist, golm, pubchem | A                          |
| 22                                                                                                                                                                                                                                                                                                                                                                                                                                                                                                                                                                                                                                                                                                                                             | 29.25     | Sucrose, 8tms derivative                                                     | Sucrose                                | Sugar            | C <sub>36</sub> H <sub>66</sub> O <sub>11</sub> Si <sub>8</sub>              | 73/999, 361/977, 217/623, 147/384, 271/313, 169/292, 243/272, 362/252, 129/223,         | <i>Actinidia chinensis</i>                                 | nist, golm, pubchem | D                          |
| 23                                                                                                                                                                                                                                                                                                                                                                                                                                                                                                                                                                                                                                                                                                                                             | 30.43     | Maltose, 8tms derivative, isomer I                                           | Maltose                                | Sugar            | C <sub>36</sub> H <sub>68</sub> O <sub>11</sub> Si <sub>8</sub>              | 204/999, 73/472, 205/187, 217/174, 147/157, 191/125, 129/104, 206/78, 103/55, 117/46    | <i>Malus domestica</i>                                     | nist, golm, pubchem | D                          |
| 24                                                                                                                                                                                                                                                                                                                                                                                                                                                                                                                                                                                                                                                                                                                                             | 31.66     | Melibiose, octakis(trimethylsilyl)-                                          | Melibiose                              | Sugar            | C <sub>36</sub> H <sub>66</sub> O <sub>11</sub> Si <sub>8</sub>              | 217/999, 73/937, 147/324, 204/292, 361/210, 103/148, 205/121, 129/88, 218/54, 75/22     | <i>Solanum lycopersicum L.</i>                             | nist, golm, pubchem | D                          |
| 25                                                                                                                                                                                                                                                                                                                                                                                                                                                                                                                                                                                                                                                                                                                                             | 32.182    | 3- alpha-,mannobiose, octakis(trimethylsilyl) ether (isomer 2)               | Mannobiose                             | Sugar            | C <sub>36</sub> H <sub>68</sub> O <sub>11</sub> Si <sub>8</sub>              | 217/999, 73/937, 147/324, 204/292, 361/210, 103/148, 205/121, 129/88, 218/54, 75/22     | <i>Bryonia laciniata</i>                                   | nist, golm, pubchem | D                          |
| 26                                                                                                                                                                                                                                                                                                                                                                                                                                                                                                                                                                                                                                                                                                                                             | 32.66     | D-(+)-Cellobiose, octakis(trimethylsilyl) ether, methyloxime (isomer 1)      | Cellobiose                             | Sugar            | C <sub>37</sub> H <sub>68</sub> O <sub>11</sub> NSi <sub>8</sub>             | 204/999, 73/785, 217/380, 361/300, 147/282, 205/208, 160/173, 103/130, 129/117, 75/57   | <i>Olea europaea</i>                                       | nist, golm, pubchem | D                          |
| 28                                                                                                                                                                                                                                                                                                                                                                                                                                                                                                                                                                                                                                                                                                                                             | 33.97     | D-lactose, octakis(trimethylsilyl) ether, methyloxime (isomer 2)             | Lactose                                | Sugar            | C <sub>37</sub> H <sub>68</sub> O <sub>11</sub> NSi <sub>8</sub>             | 204/999, 73/667, 217/394, 205/371, 147/356, 361/228, 103/204, 129/112, 206/92, 319/89   | <i>Actinidia chinensis</i>                                 | nist, golm, pubchem | D                          |
| 29                                                                                                                                                                                                                                                                                                                                                                                                                                                                                                                                                                                                                                                                                                                                             | 34.43     | D-Lactitol, nonakis(trimethylsilyl) ether                                    | Lactitol                               | Alcohol          | C <sub>39</sub> H <sub>80</sub> O <sub>11</sub> Si <sub>9</sub>              | 204/999, 73/760, 217/454, 205/396, 147/395, 361/317, 103/223, 129/152, 319/135,         | <i>Malus domestica</i>                                     | nist, golm, pubchem | D                          |
| 30                                                                                                                                                                                                                                                                                                                                                                                                                                                                                                                                                                                                                                                                                                                                             | 40.24     | 3-o-coumarouyl-D-Quinic acid                                                 | 3-o-coumarouyl-D-Quinic acid           | Other Compound   | C <sub>31</sub> H <sub>38</sub> O <sub>8</sub> Si <sub>5</sub>               | 73/999, 219/836, 345/514, 255/206, 147/103, 75/4, 346/2                                 | <i>Arabidopsis thaliana</i>                                | nist, golm, pubchem | D                          |

# Full ripe sweet cherries

|                             | 1st-year-old spur |        |         |        |        |    | 2nd-year-old spur |        |         |       |        |   |
|-----------------------------|-------------------|--------|---------|--------|--------|----|-------------------|--------|---------|-------|--------|---|
|                             | Control           |        | 1M Ca   |        | t-test |    | Control           |        | 1M Ca   |       | t-test |   |
|                             | Mean              | SD     | Mean    | SD     |        |    | Mean              | SD     | Mean    | SD    |        |   |
| Oxalic acid                 | 0.009             | 0.012  | 0.000   | 0.000  | 0.265  |    | 0.004             | 0.003  | 0.007   | 0.009 | 0.678  |   |
| Phosphoric acid             | 0.895             | 0.082  | 1.027   | 0.119  | 0.190  |    | 1.003             | 0.083  | 1.144   | 0.020 | 0.045  | * |
| Proline                     | 0.013             | 0.011  | 0.016   | 0.007  | 0.729  |    | 0.012             | 0.005  | 0.009   | 0.008 | 0.527  |   |
| Succinic acid               | 0.094             | 0.037  | 0.116   | 0.019  | 0.420  |    | 0.120             | 0.014  | 0.122   | 0.014 | 0.836  |   |
| Malic acid                  | 6.878             | 0.530  | 8.261   | 0.277  | 0.016  | *  | 7.754             | 0.244  | 7.775   | 0.229 | 0.917  |   |
| Oxoproline                  | 0.003             | 0.000  | 0.001   | 0.000  | 0.001  | ** | 0.004             | 0.001  | 0.004   | 0.003 | 0.997  |   |
| GABA                        | 0.009             | 0.006  | 0.008   | 0.003  | 0.697  |    | 0.010             | 0.005  | 0.008   | 0.004 | 0.562  |   |
| Ribose                      | 0.193             | 0.008  | 0.141   | 0.010  | 0.002  | ** | 0.168             | 0.005  | 0.152   | 0.008 | 0.040  | * |
| Arabinose                   | 1.256             | 0.034  | 0.999   | 0.061  | 0.003  | ** | 1.147             | 0.066  | 1.023   | 0.054 | 0.067  |   |
| Xylose                      | 0.014             | 0.002  | 0.009   | 0.001  | 0.010  | *  | 0.013             | 0.002  | 0.011   | 0.002 | 0.226  |   |
| Arabitol                    | 0.062             | 0.009  | 0.071   | 0.003  | 0.148  |    | 0.075             | 0.011  | 0.069   | 0.002 | 0.411  |   |
| Rhamnose                    | 0.004             | 0.002  | 0.036   | 0.020  | 0.042  | *  | 0.021             | 0.007  | 0.024   | 0.009 | 0.656  |   |
| Talose                      | 3.481             | 2.291  | 2.639   | 0.658  | 0.574  |    | 2.287             | 0.480  | 2.487   | 0.441 | 0.624  |   |
| Gulonic acid                | 0.304             | 0.526  | 0.425   | 0.424  | 0.771  |    | 0.244             | 0.221  | 0.000   | 0.000 | 0.129  |   |
| Quinic acid                 | 0.322             | 0.053  | 0.693   | 0.101  | 0.005  | ** | 0.494             | 0.099  | 0.506   | 0.099 | 0.892  |   |
| Fructose                    | 132.644           | 3.680  | 141.678 | 7.517  | 0.135  |    | 128.288           | 1.784  | 124.462 | 5.111 | 0.288  |   |
| Glucose                     | 162.730           | 6.673  | 176.427 | 18.584 | 0.296  |    | 159.489           | 11.711 | 151.230 | 3.236 | 0.304  |   |
| Galactose                   | 22.630            | 1.676  | 16.634  | 2.413  | 0.024  | *  | 17.483            | 1.233  | 16.632  | 0.823 | 0.376  |   |
| Sorbitol                    | 83.091            | 4.620  | 84.469  | 11.091 | 0.852  |    | 74.686            | 5.169  | 70.020  | 2.240 | 0.225  |   |
| Galacturonic acid           | 0.356             | 0.109  | 0.354   | 0.108  | 0.977  |    | 0.424             | 0.093  | 0.415   | 0.021 | 0.881  |   |
| Inositol                    | 0.130             | 0.014  | 0.111   | 0.026  | 0.319  |    | 0.077             | 0.066  | 0.060   | 0.103 | 0.822  |   |
| Sucrose                     | 15.441            | 0.567  | 16.814  | 0.923  | 0.093  |    | 12.222            | 0.380  | 14.140  | 0.913 | 0.028  | * |
| Maltose                     | 1.362             | 0.051  | 1.589   | 0.067  | 0.009  | ** | 1.346             | 0.141  | 1.394   | 0.055 | 0.611  |   |
| Melibiose                   | 1.117             | 0.100  | 1.201   | 0.124  | 0.410  |    | 1.043             | 0.182  | 1.077   | 0.055 | 0.771  |   |
| Mannobiose                  | 0.109             | 0.022  | 0.136   | 0.029  | 0.269  |    | 0.122             | 0.029  | 0.158   | 0.037 | 0.261  |   |
| Cellobiose                  | 1.328             | 0.086  | 1.172   | 0.167  | 0.223  |    | 1.020             | 0.106  | 1.107   | 0.094 | 0.350  |   |
| Lactose                     | 1.510             | 0.097  | 1.694   | 0.066  | 0.054  |    | 1.316             | 0.155  | 1.390   | 0.044 | 0.470  |   |
| Lactitol                    | 2.477             | 0.220  | 2.957   | 0.078  | 0.023  | *  | 2.171             | 0.225  | 2.270   | 0.060 | 0.506  |   |
| 3-o-coumaroul-D-Quinic acid | 0.003             | 0.004  | 0.050   | 0.061  | 0.248  |    | 0.001             | 0.001  | 0.048   | 0.057 | 0.227  |   |
| Sugars                      | 344.122           | 12.127 | 361.596 | 28.196 | 0.380  |    | 326.208           | 13.524 | 315.286 | 4.826 | 0.258  |   |
| Alcohols                    | 85.761            | 4.404  | 87.609  | 11.141 | 0.803  |    | 77.008            | 5.046  | 72.418  | 2.180 | 0.222  |   |
| Acids                       | 7.660             | 0.699  | 9.425   | 0.466  | 0.022  | *  | 8.796             | 0.154  | 8.826   | 0.326 | 0.895  |   |
| Other compounds             | 0.898             | 0.081  | 1.077   | 0.179  | 0.189  |    | 1.004             | 0.083  | 1.192   | 0.069 | 0.039  | * |
| Amino acids                 | 0.026             | 0.017  | 0.024   | 0.010  | 0.896  |    | 0.027             | 0.011  | 0.021   | 0.008 | 0.474  |   |

Table S4. PCA extraction variables.

| Variables             | Extraction |
|-----------------------|------------|-----------------------|------------|-----------------------|------------|-----------------------|------------|-----------------------|------------|-----------------------|------------|
| P                     | 0.864      | P                     | 0.865      | P                     | 0.858      | P                     | 0.866      | P                     | 0.867      | P                     | 0.884      |
| K                     | 0.227      | K                     | 0.231      | K                     | 0.232      | K                     | 0.212      | Ca                    | 0.659      | Ca                    | 0.648      |
| Ca                    | 0.69       | Ca                    | 0.685      | Ca                    | 0.682      | Ca                    | 0.659      | Mg                    | 0.831      | Mg                    | 0.84       |
| Mg                    | 0.808      | Mg                    | 0.811      | Mg                    | 0.836      | Mg                    | 0.834      | Na                    | 0.523      | Na                    | 0.531      |
| Na                    | 0.368      | Na                    | 0.372      | Na                    | 0.412      | Na                    | 0.486      | Zn                    | 0.547      | Zn                    | 0.544      |
| Zn                    | 0.547      | Zn                    | 0.545      | Zn                    | 0.529      | Zn                    | 0.521      | Cu                    | 0.731      | Cu                    | 0.737      |
| Cu                    | 0.651      | Cu                    | 0.675      | Cu                    | 0.717      | Cu                    | 0.738      | Mn                    | 0.812      | Mn                    | 0.815      |
| Mn                    | 0.783      | Mn                    | 0.782      | Mn                    | 0.784      | Mn                    | 0.788      | Fe                    | 0.46       | Fe                    | 0.45       |
| Fe                    | 0.439      | Fe                    | 0.437      | Fe                    | 0.421      | Fe                    | 0.431      | Anthocyanins          | 0.747      | Anthocyanins          | 0.758      |
| Anthocyanins          | 0.745      | Anthocyanins          | 0.741      | Anthocyanins          | 0.743      | Anthocyanins          | 0.744      | Polyphenols           | 0.471      | Polyphenols           | 0.475      |
| Flavonols             | 0.061      | Hydroxycinnamic acid  | 0.181      | Polyphenols           | 0.461      | Polyphenols           | 0.464      | Christensen water abs | 0.262      | Christensen cracking  | 0.467      |
| Hydroxycinnamic acid  | 0.204      | Polyphenols           | 0.442      | Christensen water abs | 0.298      | Christensen water abs | 0.262      | Christensen cracking  | 0.424      | Waterfall water abs   | 0.435      |
| Polyphenols           | 0.441      | Christensen water abs | 0.303      | Christensen cracking  | 0.392      | Christensen cracking  | 0.433      | Waterfall water abs   | 0.415      | Waterfall cracking    | 0.451      |
| Christensen water abs | 0.305      | Christensen cracking  | 0.381      | Waterfall water abs   | 0.395      | Waterfall water abs   | 0.418      | Waterfall cracking    | 0.448      | Cracking in the field | 0.713      |
| Christensen cracking  | 0.375      | Waterfall water abs   | 0.396      | Waterfall cracking    | 0.441      | Waterfall cracking    | 0.452      | Cracking in the field | 0.744      | Dry weight            | 0.631      |
| Waterfall water abs   | 0.39       | Waterfall cracking    | 0.445      | Cracking in the field | 0.744      | Cracking in the field | 0.742      | Dry weight            | 0.628      | Penetration           | 0.388      |
| Waterfall cracking    | 0.437      | Cracking in the field | 0.739      | Dry weight            | 0.649      | Dry weight            | 0.656      | Penetration           | 0.409      | Respiration rate      | 0.757      |
| Cracking in the field | 0.726      | Dry weight            | 0.65       | Penetration           | 0.417      | Penetration           | 0.402      | Respiration rate      | 0.754      | Ratio flesh to fruit  | 0.274      |
| Dry weight            | 0.653      | Penetration           | 0.416      | Respiration rate      | 0.849      | Respiration rate      | 0.796      | Ratio flesh to fruit  | 0.291      | TSS                   | 0.4        |
| Penetration           | 0.414      | Respiration rate      | 0.857      | Ratio flesh to fruit  | 0.291      | Ratio flesh to fruit  | 0.291      | TSS                   | 0.404      |                       |            |
| Respiration rate      | 0.844      | Ratio flesh to fruit  | 0.282      | TSS                   | 0.394      | TSS                   | 0.404      |                       |            |                       |            |
| Ratio flesh to fruit  | 0.28       | TSS                   | 0.402      | TA                    | 0.201      |                       |            |                       |            |                       |            |
| TSS                   | 0.411      | TA                    | 0.252      |                       |            |                       |            |                       |            |                       |            |
| TA                    | 0.274      |                       |            |                       |            |                       |            |                       |            |                       |            |

The lowest variable extraction was rejected from the model until all remaining variables to have extraction higher than 0.5.

| Variables             | Extraction | Variables             | Extraction | Variables             | Extraction | Variables             | Extraction |
|-----------------------|------------|-----------------------|------------|-----------------------|------------|-----------------------|------------|
| P                     | 0.883      | P                     | 0.912      | P                     | 0.929      | P                     | 0.932      |
| Ca                    | 0.634      | Ca                    | 0.604      | Ca                    | 0.6        | Ca                    | 0.623      |
| Mg                    | 0.827      | Mg                    | 0.839      | Mg                    | 0.871      | Mg                    | 0.877      |
| Na                    | 0.483      | Na                    | 0.48       | Na                    | 0.462      | Zn                    | 0.614      |
| Zn                    | 0.573      | Zn                    | 0.597      | Zn                    | 0.591      | Cu                    | 0.769      |
| Cu                    | 0.776      | Cu                    | 0.776      | Cu                    | 0.77       | Mn                    | 0.743      |
| Mn                    | 0.801      | Mn                    | 0.787      | Mn                    | 0.76       | Anthocyanins          | 0.746      |
| Fe                    | 0.464      | Fe                    | 0.424      | Anthocyanins          | 0.744      | Polyphenols           | 0.509      |
| Anthocyanins          | 0.728      | Anthocyanins          | 0.74       | Polyphenols           | 0.516      | Christensen cracking  | 0.56       |
| Polyphenols           | 0.472      | Polyphenols           | 0.494      | Christensen cracking  | 0.57       | Waterfall water abs   | 0.542      |
| Christensen cracking  | 0.538      | Christensen cracking  | 0.568      | Waterfall water abs   | 0.537      | Waterfall cracking    | 0.515      |
| Waterfall water abs   | 0.514      | Waterfall water abs   | 0.531      | Waterfall cracking    | 0.505      | Cracking in the field | 0.622      |
| Waterfall cracking    | 0.52       | Waterfall cracking    | 0.514      | Cracking in the field | 0.644      | Dry weight            | 0.617      |
| Cracking in the field | 0.643      | Cracking in the field | 0.635      | Dry weight            | 0.608      | Respiration rate      | 0.84       |
| Dry weight            | 0.588      | Dry weight            | 0.593      | Respiration rate      | 0.781      |                       |            |
| Penetration           | 0.408      | Respiration rate      | 0.77       |                       |            |                       |            |
| Respiration rate      | 0.78       |                       |            |                       |            |                       |            |

Table S5. Quantitative results of nutrients in fruits.

| Phosphorus (P, % DW)         |                           |       |      | Potassium (K, % DW)          |                           |      |       | Magnesium (Mg, % DW)         |                           |      |      | Sodium (Na, % DW)            |                           |      |    | Iron (Fe, ppm)               |                           |       |      |
|------------------------------|---------------------------|-------|------|------------------------------|---------------------------|------|-------|------------------------------|---------------------------|------|------|------------------------------|---------------------------|------|----|------------------------------|---------------------------|-------|------|
|                              |                           | Mean  | SD   |                              |                           | Mean | SD    |                              |                           | Mean | SD   |                              |                           | Mean | SD |                              |                           | Mean  | SD   |
| Treatment (T)                | Control                   | 0.29  | 0.04 | Treatment (T)                | Control                   | 1.32 | 0.17  | Treatment                    | Control                   | 0.06 | 0.01 | Treatment (T)                | Control                   | 0.02 | 0  | Treatment (T)                | Control                   | 18.98 | 3.11 |
|                              | CaCl <sub>2</sub> * 0.25M | 0.3   | 0.05 |                              | CaCl <sub>2</sub> * 0.25M | 1.28 | 0.2   |                              | CaCl <sub>2</sub> * 0.25M | 0.06 | 0.01 |                              | CaCl <sub>2</sub> * 0.25M | 0.02 | 0  |                              | CaCl <sub>2</sub> * 0.25M | 19.93 | 3.73 |
|                              | 0.5M                      | 0.29  | 0.03 |                              | 0.5M                      | 1.32 | 0.16  |                              | 0.5M                      | 0.05 | 0.01 |                              | 0.5M                      | 0.02 | 0  |                              | 0.5M                      | 17.73 | 3.61 |
|                              | 2H <sub>2</sub> O 1M      | 0.29  | 0.03 |                              | 2H <sub>2</sub> O 1M      | 1.17 | 0.12  |                              | 1M                        | 0.05 | 0.01 |                              | 2H <sub>2</sub> O 1M      | 0.02 | 0  |                              | 2H <sub>2</sub> O 1M      | 18.69 | 1.48 |
| Age of Flower spur (AS) buds |                           |       |      | Age of Flower spur (AS) buds |                           |      |       | Age of Flower spur (AS) buds |                           |      |      | Age of Flower spur (AS) buds |                           |      |    | Age of Flower spur (AS) buds |                           |       |      |
|                              |                           | 1st   | 0.29 | 0.04                         |                           |      | 1st   | 1.28                         | 0.19                      |      |      | 1st                          | 0.02                      | 0    |    |                              | 1st                       | 18.84 | 3.68 |
|                              |                           | 2nd   | 0.29 | 0.03                         |                           |      | 2nd   | 1.27                         | 0.16                      |      |      | 2nd                          | 0.02                      | 0    |    |                              | 2nd                       | 18.82 | 2.53 |
| Ripening (R) Color           |                           |       |      | Ripening (R) Color           |                           |      |       | Ripening (R) Color           |                           |      |      | Ripening (R) Color           |                           |      |    | Ripening (R) Color           |                           |       |      |
|                              |                           | Red   | 0.32 | 0.03                         |                           |      | Red   | 1.32                         | 0.15                      |      |      | Red                          | 0.02                      | 0    |    |                              | Red                       | 19.17 | 2.27 |
|                              |                           | Black | 0.27 | 0.02                         |                           |      | Black | 1.22                         | 0.18                      |      |      | Black                        | 0.02                      | 0    |    |                              | Black                     | 18.49 | 3.81 |
| Factors                      | P-value                   | N     |      | Factors                      | P-value                   | N    |       | Factors                      | P-value                   | N    |      | Factors                      | P-value                   | N    |    | Factors                      | P-value                   | N     |      |
| T                            | 0.755                     | 12    |      | T                            | 0.051                     | 12   |       | T                            | 0.169                     | 12   |      | T                            | 0.489                     | 12   |    | T                            | 0.333                     | 12    |      |
| AS                           | 0.461                     | 24    |      | AS                           | 0.858                     | 24   |       | AS                           | 0.609                     | 24   |      | AS                           | 0.021                     | 24   |    | AS                           | 0.978                     | 24    |      |
| R                            | <0.001                    | 24    |      | R                            | 0.021                     | 24   |       | R                            | <0.001                    | 24   |      | R                            | 0.58                      | 24   |    | R                            | 0.419                     | 24    |      |
| T*AS                         | 0.655                     | 6     |      | T*AS                         | 0.611                     | 6    |       | T*AS                         | 0.732                     | 6    |      | T*AS                         | 0.301                     | 6    |    | T*AS                         | 0.081                     | 6     |      |
| T*R                          | 0.5                       | 6     |      | T*R                          | 0.119                     | 6    |       | T*R                          | 0.615                     | 6    |      | T*R                          | 0.679                     | 6    |    | T*R                          | 0.088                     | 6     |      |
| AS*R                         | 0.078                     | 12    |      | AS*R                         | 0.03                      | 12   |       | AS*R                         | 0.157                     | 12   |      | AS*R                         | 0.758                     | 12   |    | AS*R                         | 0.576                     | 12    |      |
| T*AS*R                       | 0.807                     | 3     |      | T*AS*R                       | 0.109                     | 3    |       | T*AS*R                       | 0.618                     | 3    |      | T*AS*R                       | 0.772                     | 3    |    | T*AS*R                       | 0.314                     | 3     |      |

Different letters indicate significant difference based on Duncan's Multiple Range Test  $P \leq 0.05$

Different letters indicate significant difference based on Duncan's Multiple Range Test  $P \leq 0.05$
